# Supplementary material for: Ferroelectric and strain-tuned MoSe2/Bi2O2Se van der Waals heterostructure with band alignment evolution
Source: Royal Society of Chemistry journal article supplement (doi:10.1039/d3cp01446k), 2023-01-01
Supplement: d3cp01446k1.pdf [file d3cp01446k1.pdf]

**Ferroelectric and strain-tuned MoSe<sub>2</sub>/Bi<sub>2</sub>O<sub>2</sub>Se van der Waals  
heterostructure with band alignment evolution**

Shucao Lu<sup>a</sup>, Yanlu Li<sup>a,\*</sup>, Xian Zhao<sup>b,\*</sup>

<sup>a</sup>State Key Laboratory of Crystal Materials and Institute of Crystal Materials, Shandong University, Jinan, 250100, China

<sup>b</sup>Center for Optics Research and Engineering of Shandong University, Shandong University, Qingdao, 266237, China

Corresponding authors:

Y. L. Li email: [liyanlu@sdu.edu.cn](mailto:liyanlu@sdu.edu.cn)

X. Zhao email: [xianzhao@sdu.edu.cn](mailto:xianzhao@sdu.edu.cn)

## Supporting Information

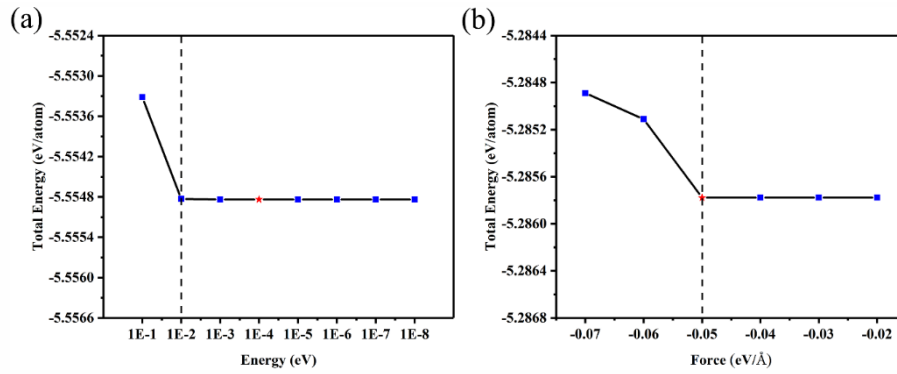

**Fig. S1.** Convergence tests for energy (a) and force (b), respectively.

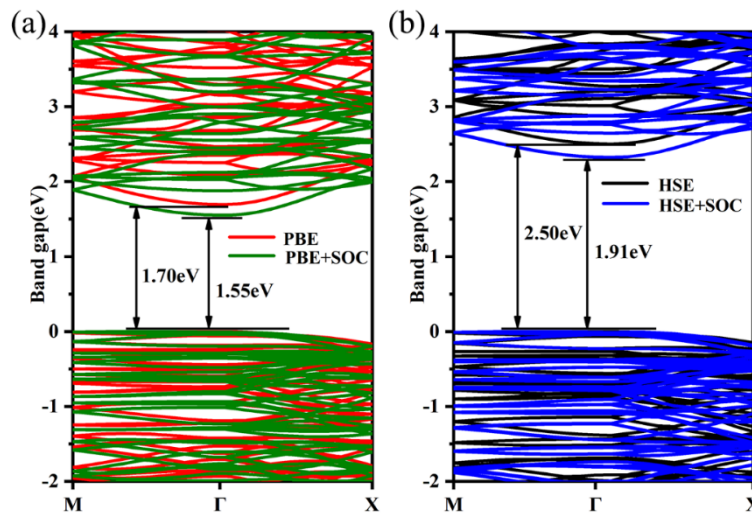

**Fig.S2.** Band structures of the  $\text{Bi}_2\text{O}_2\text{Se}$  monolayer (zipper surface model with  $3\times 4$  supercell) with (a) PBE, PBE+SOC and (b) HSE, HSE+SOC approaches.

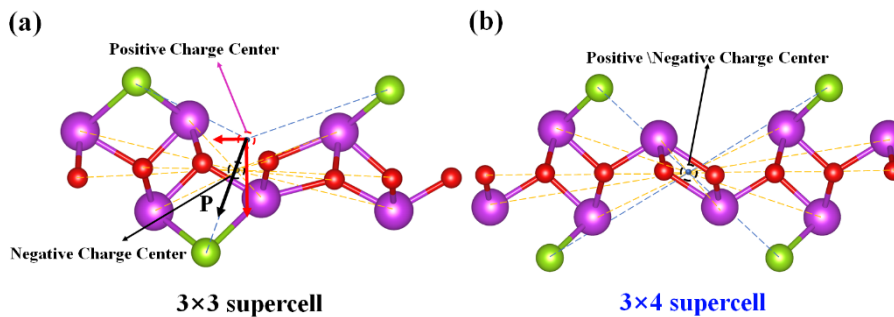

**Fig.S3.** Positive and negative charge centers of  $3\times 3$  (a) and  $3\times 4$  (b)  $\text{Bi}_2\text{O}_2\text{Se}$  monolayers.

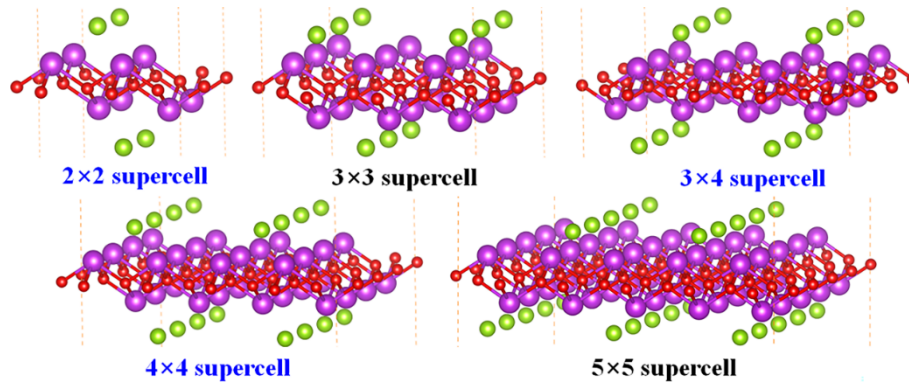

**Fig.S4.** Crystal structures of the  $\text{Bi}_2\text{O}_2\text{Se}$  monolayer with  $2 \times 2$ ,  $3 \times 3$ ,  $3 \times 4$ ,  $4 \times 4$  and  $5 \times 5$  supercells.

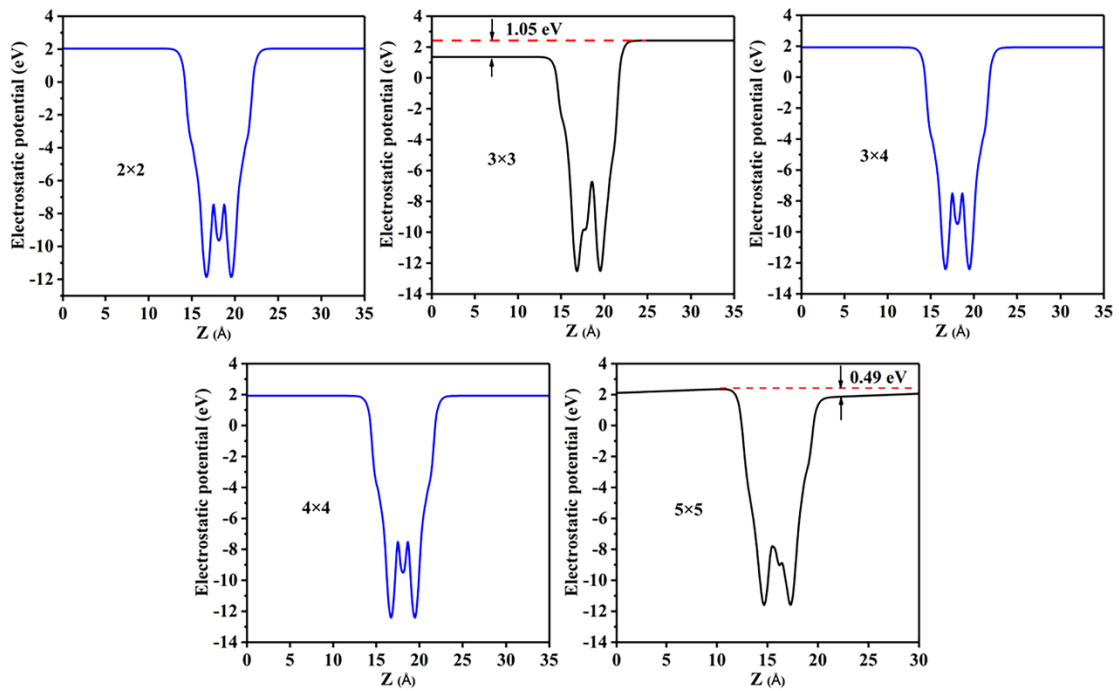

**Fig.S5.** Electrostatic potentials of the  $\text{Bi}_2\text{O}_2\text{Se}$  monolayer with  $2 \times 2$ ,  $3 \times 3$ ,  $3 \times 4$ ,  $4 \times 4$  and  $5 \times 5$  supercells.

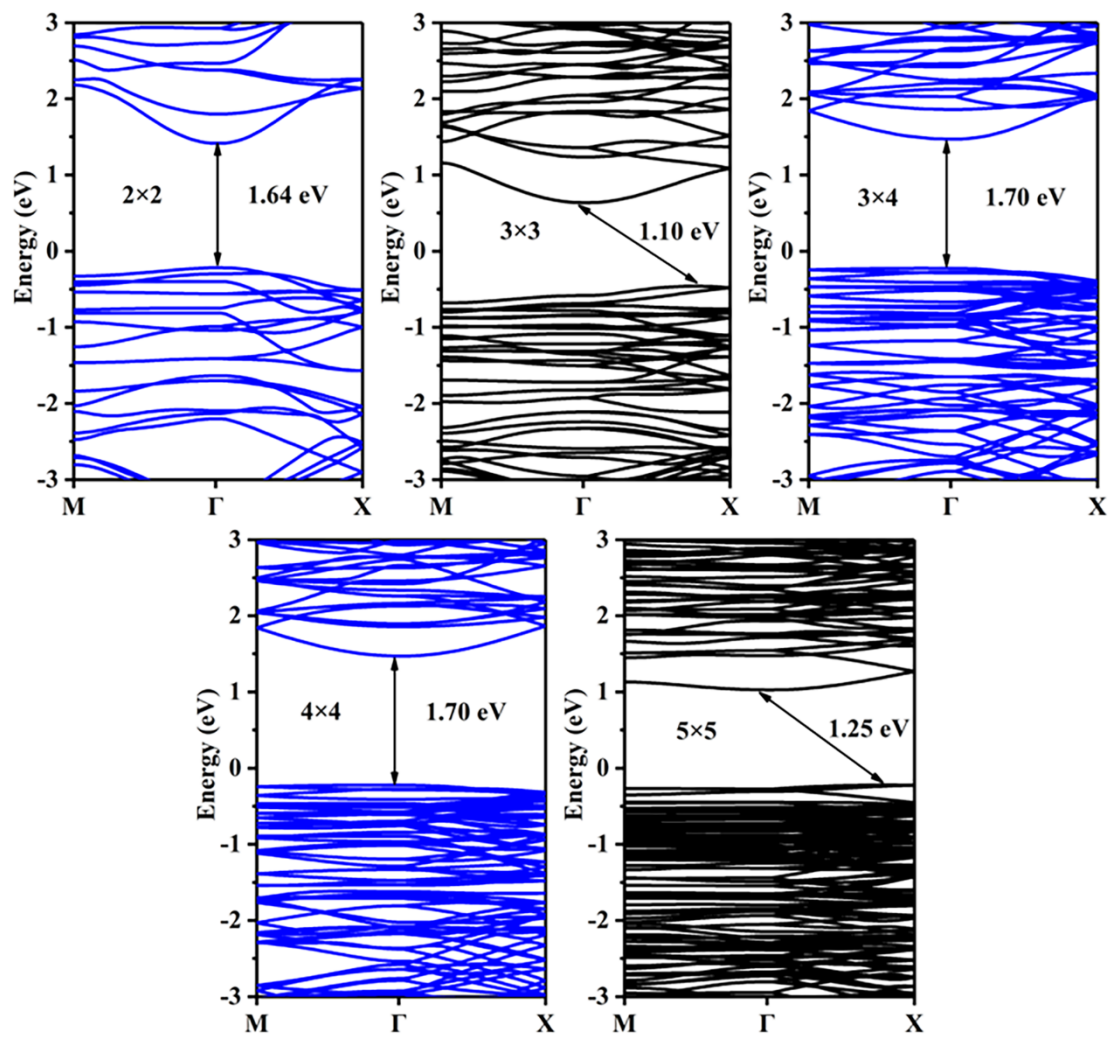

**Fig.S6.** Band structures of the  $\text{Bi}_2\text{O}_2\text{Se}$  monolayer with  $2 \times 2$ ,  $3 \times 3$ ,  $3 \times 4$ ,  $4 \times 4$  and  $5 \times 5$  supercells. The Fermi level is set to zero.

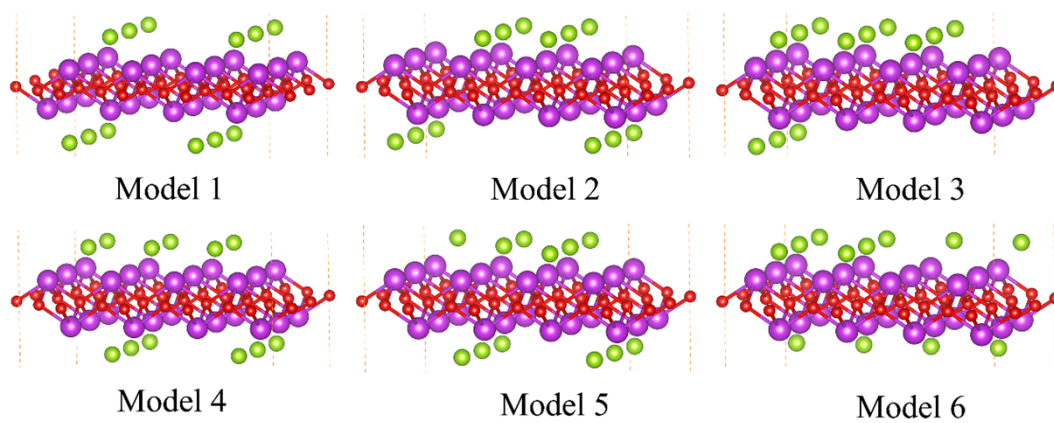

**Fig.S7.** Crystal structures of the considered  $\text{Bi}_2\text{O}_2\text{Se}$  monolayer models.

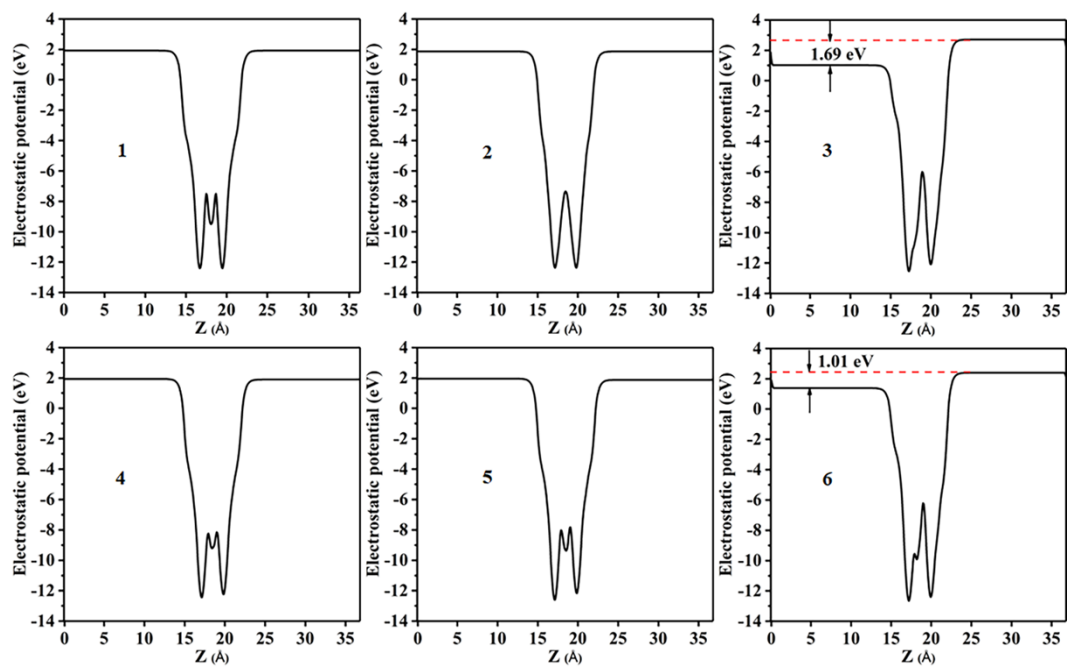

**Fig.S8.** Electrostatic potentials of the considered  $\text{Bi}_2\text{O}_2\text{Se}$  monolayer models.

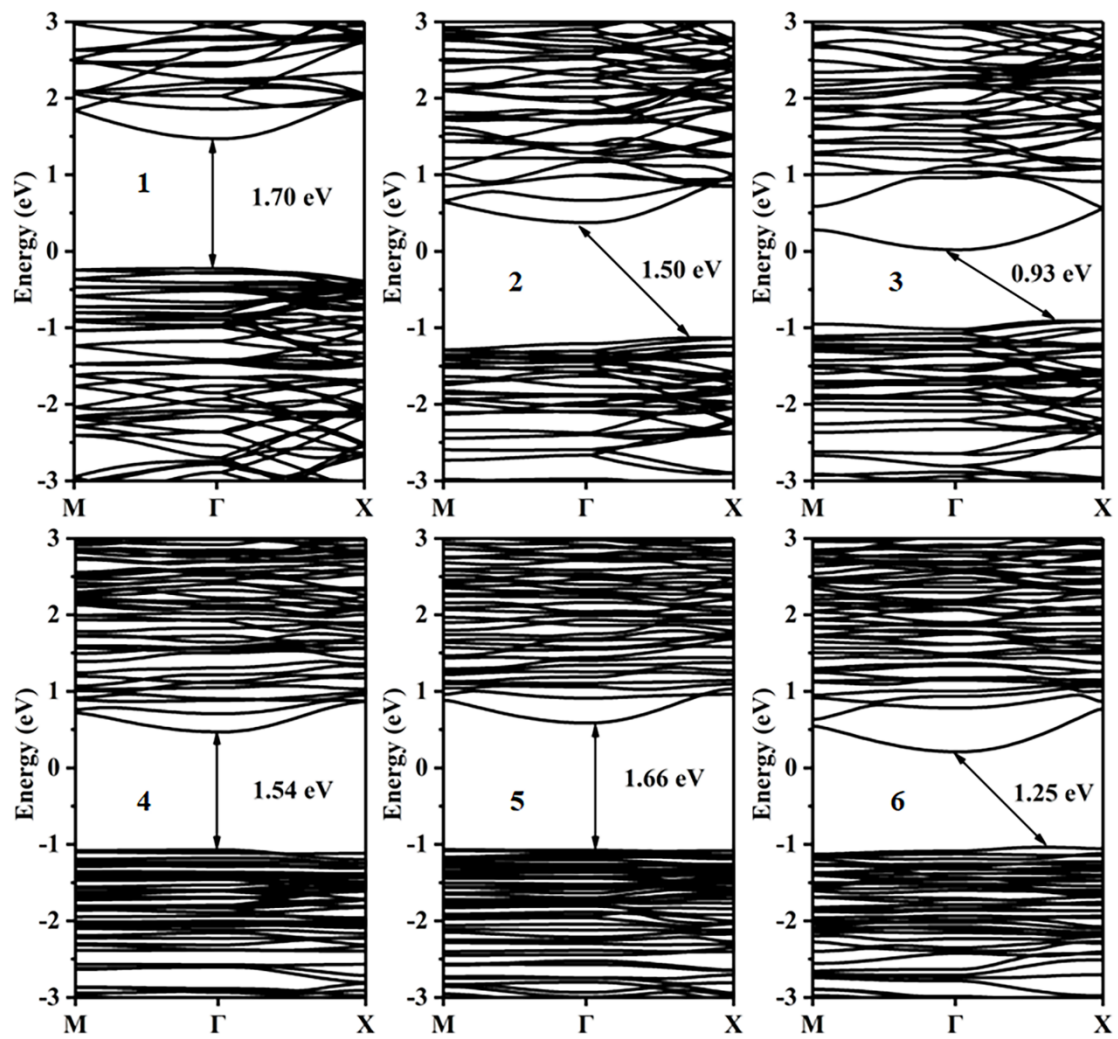

**Fig.S9.** Band structures of the considered Bi<sub>2</sub>O<sub>2</sub>Se monolayer models. The Fermi level is set to zero.

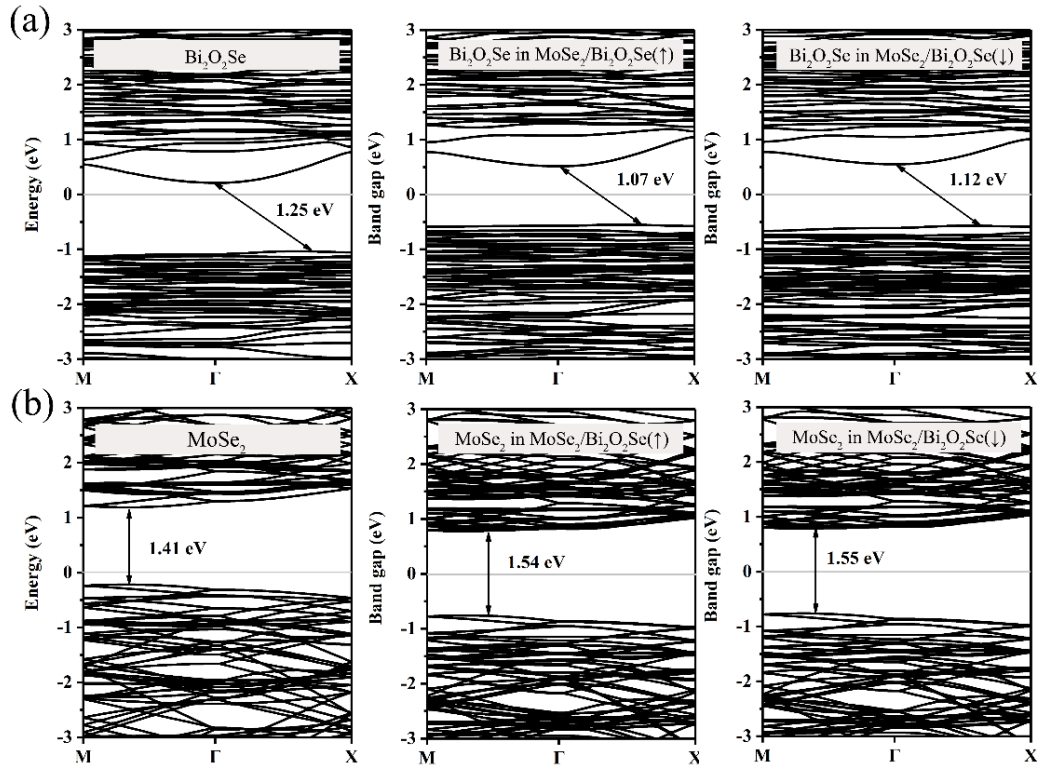

**Fig. S10.** Band structures of  $\text{Bi}_2\text{O}_2\text{Se}$  and those in  $\text{MoSe}_2/\text{Bi}_2\text{O}_2\text{Se}(\uparrow)$  and  $\text{MoSe}_2/\text{Bi}_2\text{O}_2\text{Se}(\downarrow)$  (a), as well as  $\text{MoSe}_2$  and those in  $\text{MoSe}_2/\text{Bi}_2\text{O}_2\text{Se}(\uparrow)$  and  $\text{MoSe}_2/\text{Bi}_2\text{O}_2\text{Se}(\downarrow)$  (b).

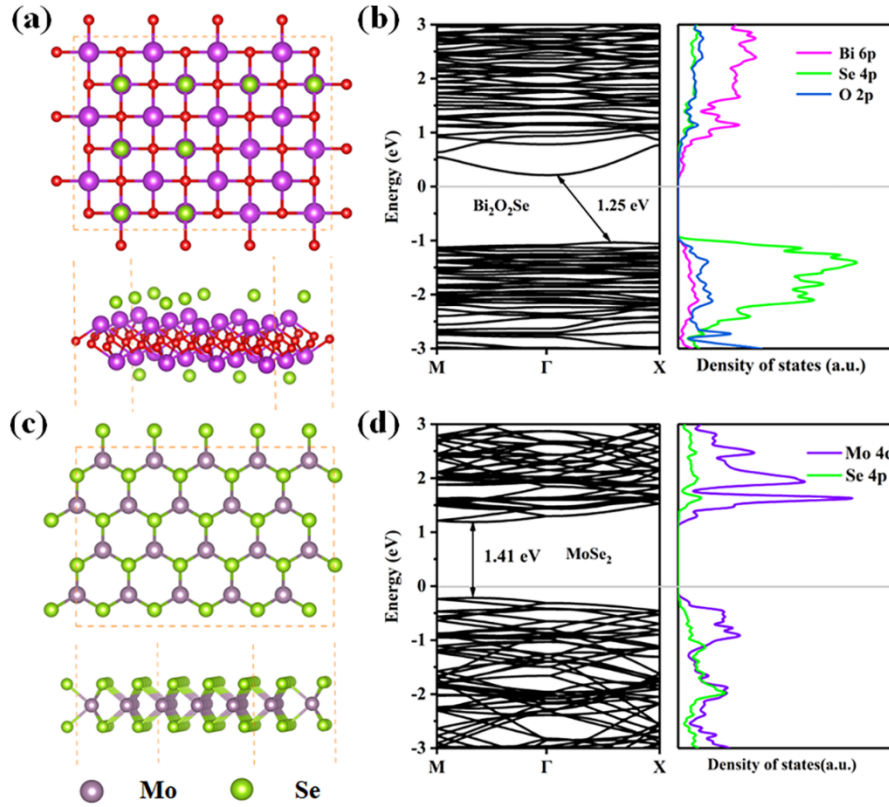

**Fig.S11.** Top- and side-view of the crystal structures, band structures and projected density of states of (a, b)  $\text{Bi}_2\text{O}_2\text{Se}$  and (c, d)  $\text{MoSe}_2$ . The Fermi level is set to zero.

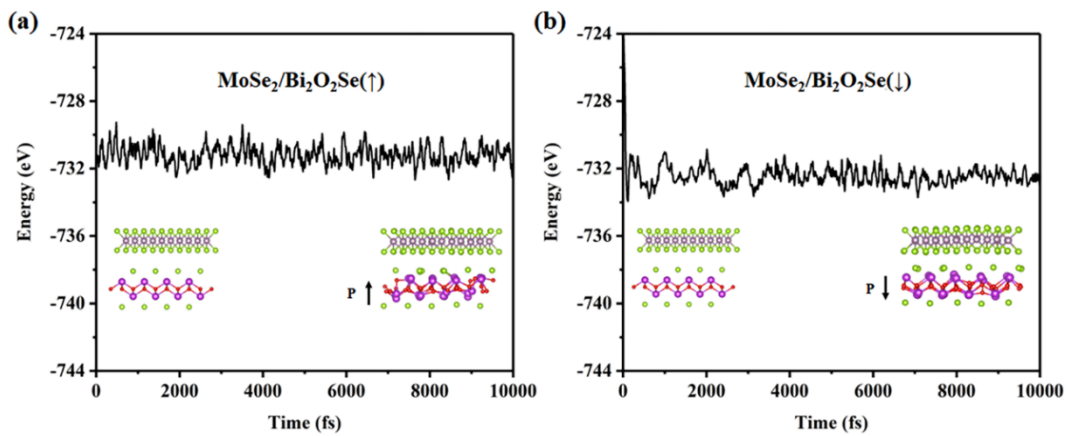

**Fig.S12.** Variation of the total energies of (a)  $\text{MoSe}_2/\text{Bi}_2\text{O}_2\text{Se}(\uparrow)$  and (b)  $\text{MoSe}_2/\text{Bi}_2\text{O}_2\text{Se}(\downarrow)$  at 300 K. The structures before and after the evolution of 10 ps are also shown.



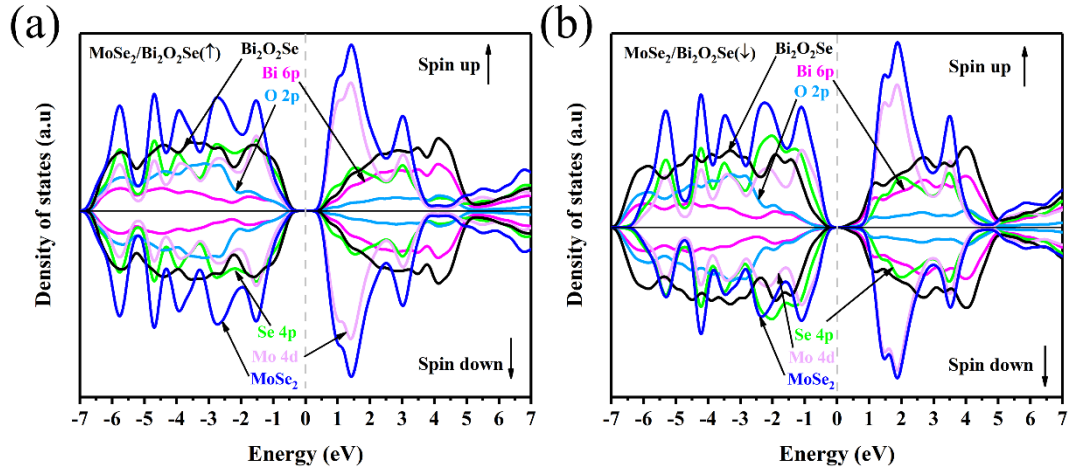

**Fig. S13.** Spin density of states of MoSe<sub>2</sub>/Bi<sub>2</sub>O<sub>2</sub>Se (↑) and MoSe<sub>2</sub>/Bi<sub>2</sub>O<sub>2</sub>Se (↓).

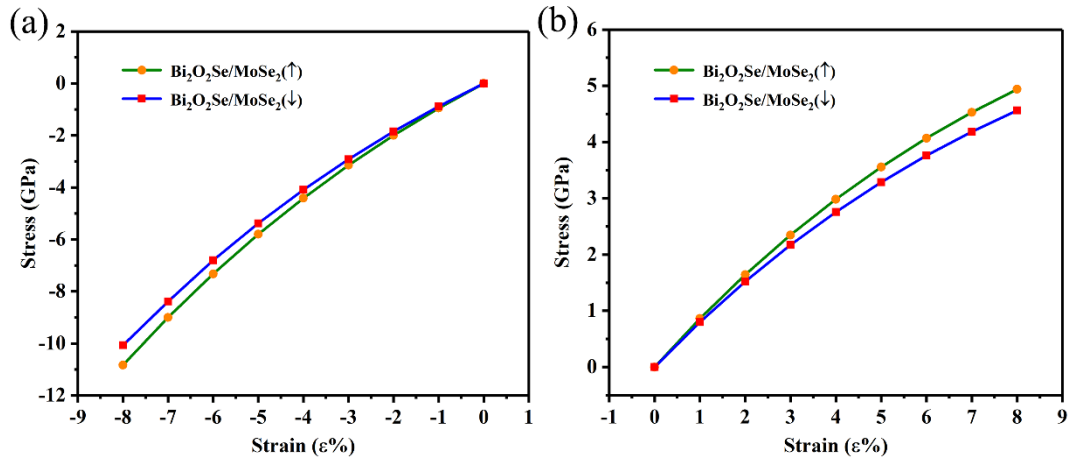

**Fig. S14.** The curve of stress vs. strain of the heterostructure under tensile strain (a) and compressive strain (b).

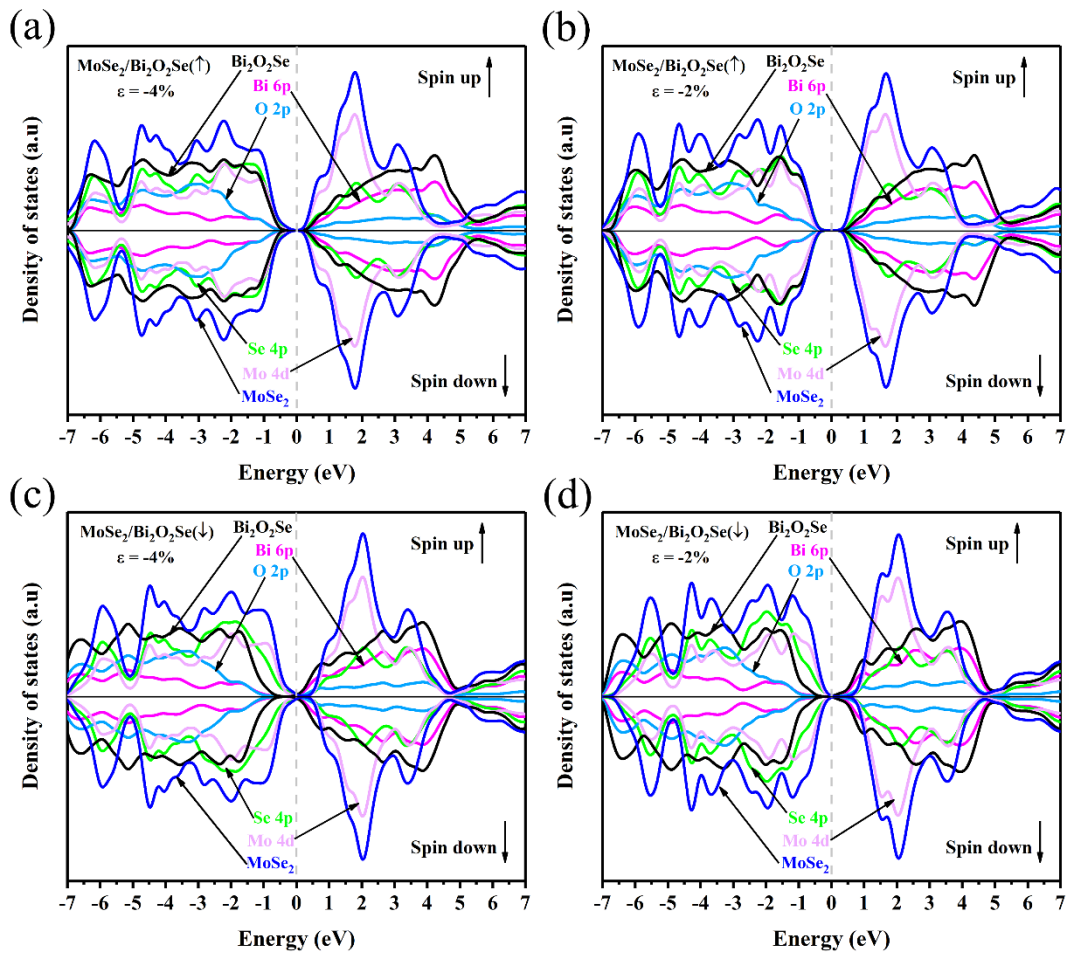

**Fig. S15.** Spin density of states of MoSe<sub>2</sub>/Bi<sub>2</sub>O<sub>2</sub>Se (↑) under the in-plane strain of (a)  $\varepsilon = -4\%$  and (b)  $\varepsilon = -2\%$ , and of MoSe<sub>2</sub>/Bi<sub>2</sub>O<sub>2</sub>Se (↓) under the in-plane strain of (c)  $\varepsilon = -4\%$  and (d)  $\varepsilon = -2\%$ .

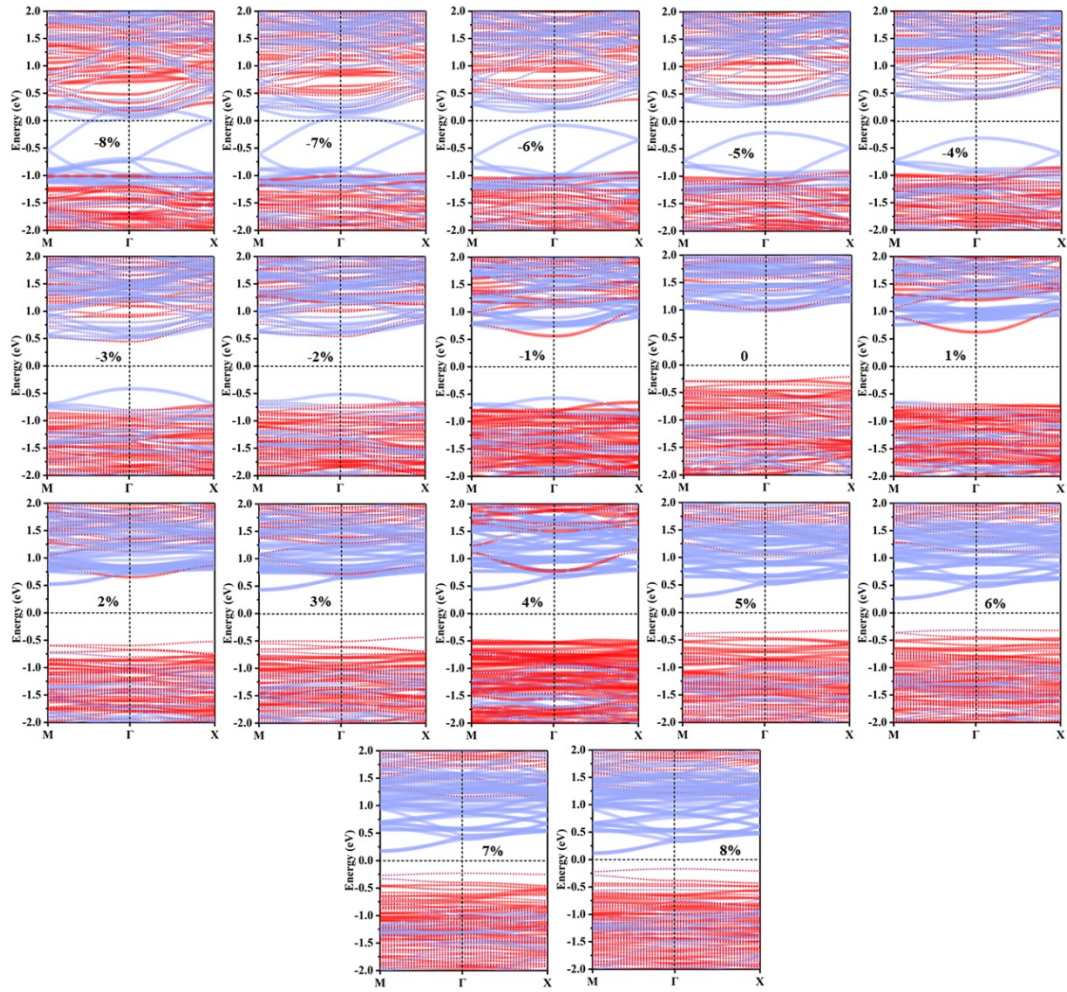

**Fig. S16.** Projected band structures of  $\text{MoSe}_2/\text{Bi}_2\text{O}_2\text{Se}(\uparrow)$  under different in-plane strain. The Fermi level set to be zero. Red and blue dots represent the contributions of  $\text{Bi}_2\text{O}_2\text{Se}$  and  $\text{MoSe}_2$  layers, respectively.

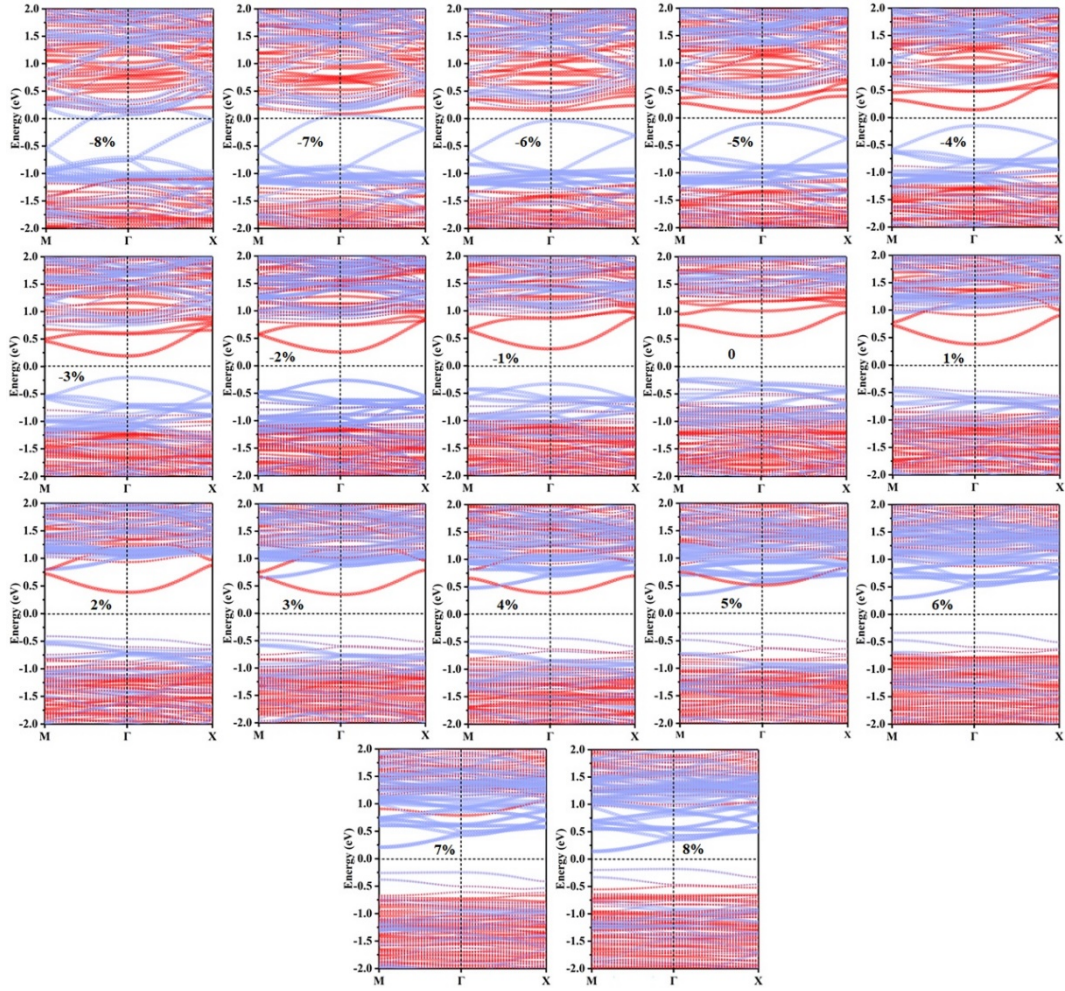

**Fig. S17.** Projected band structures of  $\text{MoSe}_2/\text{Bi}_2\text{O}_2\text{Se}(\downarrow)$  under different in-plane strain. The Fermi level set to be zero. Red and blue dots represent the contributions of  $\text{Bi}_2\text{O}_2\text{Se}$  and  $\text{MoSe}_2$  layers, respectively.

**Table S1.** Formation energies (eV/atom) of 6 different Bi<sub>2</sub>O<sub>2</sub>Se monolayer models

| Formation energy (eV/atom) |        |
|----------------------------|--------|
| Model 1                    | -0.912 |
| Model 2                    | -0.891 |
| Model 3                    | -0.882 |
| Model 4                    | -0.897 |
| Model 5                    | -0.901 |
| Model 6                    | -0.895 |

**Table S2.** Binding energies  $E_b$  of the considered Bi<sub>2</sub>O<sub>2</sub>Se monolayer models in Fig. S7.

| $E_b$ (emV/Å <sup>2</sup> ) |        |
|-----------------------------|--------|
| Model 1                     | 157.43 |
| Model 2                     | 164.33 |
| Model 3                     | 167.40 |
| Model 4                     | 162.77 |
| Model 5                     | 160.95 |
| Model 6                     | 163.07 |

**Table S3.** Bond lengths (Å) of Bi-Se in Bi<sub>2</sub>O<sub>2</sub>Se and Mo-Se in MoSe<sub>2</sub> as a function of biaxial strain for MoSe<sub>2</sub>/Bi<sub>2</sub>O<sub>2</sub>Se(↑) and MoSe<sub>2</sub>/Bi<sub>2</sub>O<sub>2</sub>Se(↓)

|     | MoSe <sub>2</sub> /Bi <sub>2</sub> O <sub>2</sub> Se(↑) |             | MoSe <sub>2</sub> /Bi <sub>2</sub> O <sub>2</sub> Se(↓) |             |
|-----|---------------------------------------------------------|-------------|---------------------------------------------------------|-------------|
|     | $d_{Bi-Se}$                                             | $d_{Mo-Se}$ | $d_{Bi-Se}$                                             | $d_{Mo-Se}$ |
| -8% | 2.748                                                   | 2.475       | 2.697                                                   | 2.485       |
| -6% | 2.758                                                   | 2.473       | 2.826                                                   | 2.514       |
| -4% | 2.863                                                   | 2.493       | 2.735                                                   | 2.496       |
| -2% | 2.990                                                   | 2.496       | 2.808                                                   | 2.512       |
| 0%  | 3.019                                                   | 2.518       | 2.883                                                   | 2.529       |
| 2%  | 3.012                                                   | 2.574       | 2.905                                                   | 2.527       |
| 4%  | 3.173                                                   | 2.600       | 2.975                                                   | 2.540       |
| 6%  | 3.128                                                   | 2.630       | 3.001                                                   | 2.551       |
| 8%  | 3.335                                                   | 2.657       | 3.178                                                   | 2.572       |
